# Supplementary material for: The Preparation of Golgi Apparatus-Targeted Polymer Dots Encapsulated with Carbon Nanodots of Bright Near-Infrared Fluorescence for Long-Term Bioimaging
Source: MDPI journal article supplement (doi:10.3390/molecules28176366), 2023-08-31
Supplement: s1 [file s1]

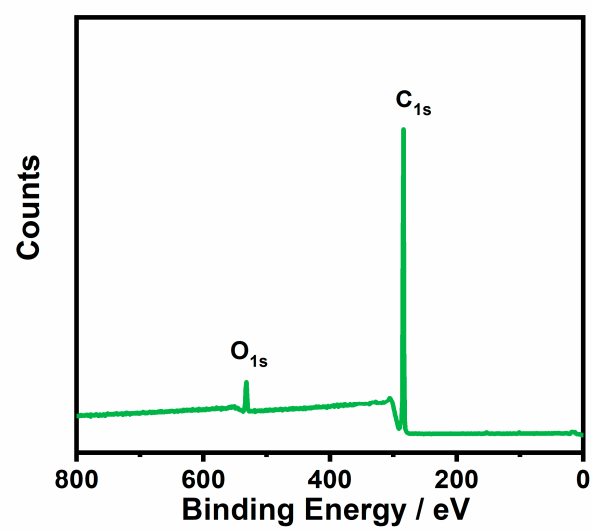

**Figure S1** XPS survey spectrum of the CNDs.

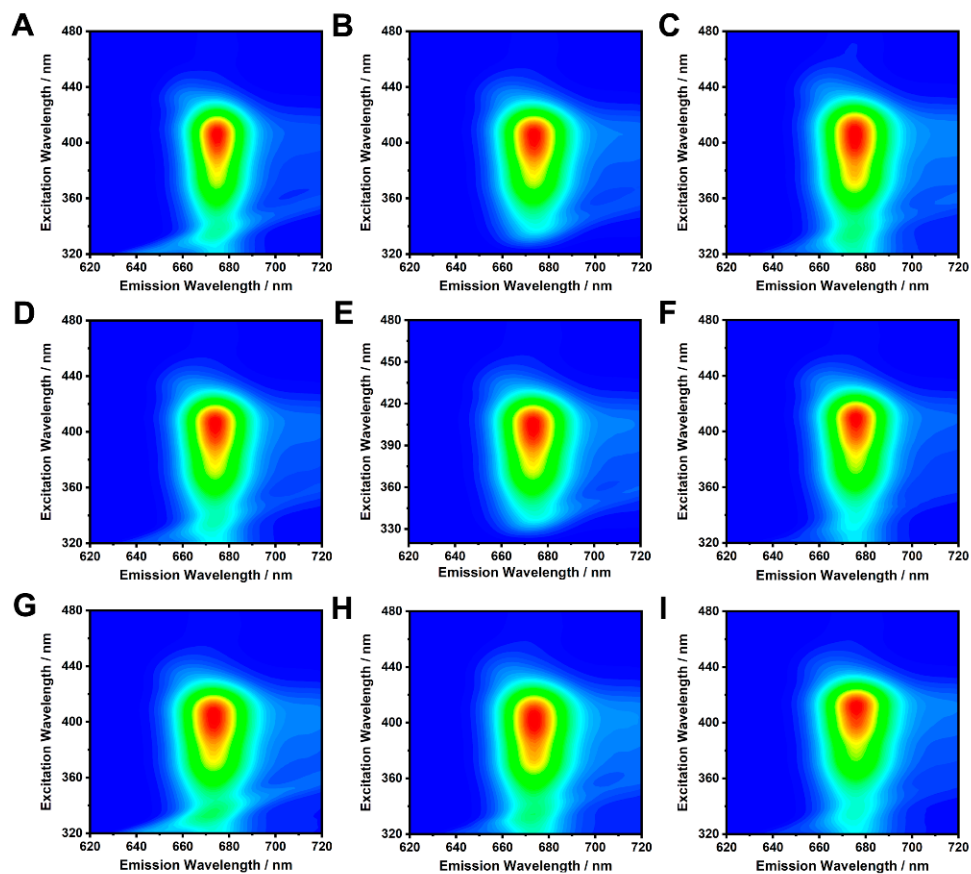

**Figure S2** Excitation-emission contour plots of the CNDs in different organic solvents:  
 (A) petroleum ether, (B) DCM, (C) n-butanol, (D) ethyl acetate, (E) dioxane, (F) acetone, (G) acetonitrile, (H) methanol, and (I) DMSO.

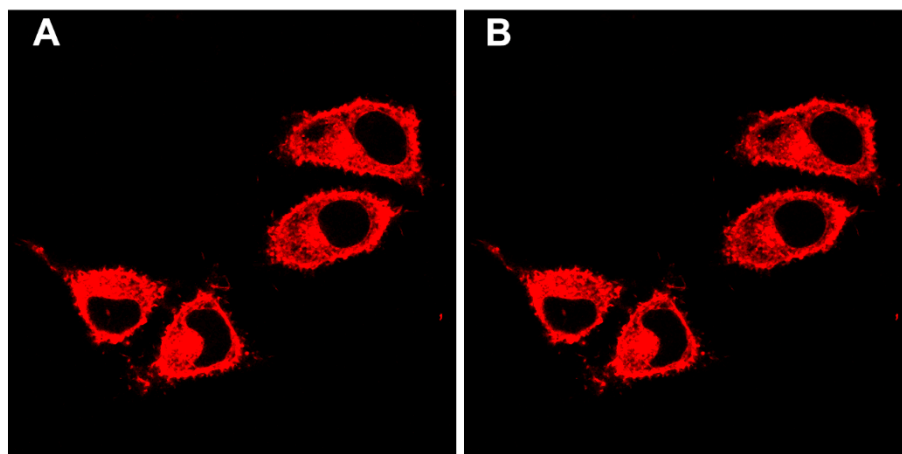

**Figure S3** Temporal evolution of fluorescence signals of Golgi-Pdots in cells under continuous irradiation: (A) 0 min; (B) 60 min.
